# Supplementary material for: Complete Genome Sequence and Comparative Analysis of the Wild-type Commensal Escherichia coli Strain SE11 Isolated from a Healthy Adult
Source: PubMed Central journal article supplement — DNA Res. 2008 Oct 17;15(6):375–86. doi: 10.1093/dnares/dsn026 (PMC2608844; doi:10.1093/dnares/dsn026), 2008-10-17
Supplement: dsn026_1.pdf [file dsn026_1.pdf]

**Supplementary Table S1.** Comparative overview of sequenced *E. coli* genomes

| Type<br>Strain<br>ECOR group | Non-pathogen             |           |                  |                 |                 |                |               |
|------------------------------|--------------------------|-----------|------------------|-----------------|-----------------|----------------|---------------|
|                              | Commensal                |           | Laboratory       |                 |                 |                | Environmental |
|                              | <b>SE11</b><br><b>B1</b> | HS<br>A   | K-12 MG1655<br>A | K-12 W3110<br>A | K-12 DH10B<br>A | ATCC 8739<br>A | SMS-3-5<br>D  |
| Chromosome size (bp)         | <b>4,887,515</b>         | 4,643,538 | 4,639,675        | 4,646,332       | 4,686,137       | 4,746,218      | 5,068,389     |
| GC content (%)               | <b>50.8</b>              | 50.8      | 50.8             | 50.0            | 50.8            | 50.9           | 50.5          |
| Protein-coding genes         | <b>4,679</b>             | 4,384     | 4,133            | 4,226           | 4,126           | 4,200          | 4,743         |
| tRNA gene                    | <b>86</b>                | 88        | 87               | 86              | 86              | 87             | 90            |
| rRNA gene                    | <b>22</b>                | 22        | 22               | 22              | 22              | 23             | 22            |
| Plasmid                      | <b>6</b>                 | None      | None             | None            | None            | None           | 4             |

  

| Pathotype<br>Strain<br>ECOR group | Pathogen        |                  |               |              |             |           |           |
|-----------------------------------|-----------------|------------------|---------------|--------------|-------------|-----------|-----------|
|                                   | EHEC            |                  | ETEC          | UPEC         |             |           | APEC      |
|                                   | O157 Sakai<br>E | O157 EDL933<br>E | E24377A<br>B1 | CFT073<br>B2 | UTI89<br>B2 | 536<br>B2 | O1<br>B2  |
| Chromosome size (bp)              | 5,498,450       | 5,528,445        | 4,979,619     | 5,231,428    | 5,065,741   | 4,938,920 | 5,082,025 |
| GC content (%)                    | 50.5            | 50.5             | 50.6          | 50.5         | 50.6        | 50.5      | 50.5      |
| Protein-coding genes              | 5,253           | 5,324            | 4,755         | 5,379        | 5,044       | 4,629     | 4,457     |
| tRNA gene                         | 103             | 100              | 91            | 88           | 88          | 81        | 72        |
| rRNA gene                         | 22              | 22               | 21            | 22           | 22          | 22        | 22        |
| Plasmid                           | 2               | 1                | 6             | None         | 1           | None      | 4         |

**Supplementary Table S2.** IS elements in the SE11 genome

| Name               | Copy number*   |
|--------------------|----------------|
| IS1                | 1 (0)          |
| IS1 (nuxi)         | 2 (1)          |
| IS2                | 1 (1)          |
| IS3                | 2 (0)          |
| IS602              | 1 (1)          |
| IS629              | 1 (1)          |
| IS911              | 1 (1)          |
| IS186A             | 1 (1)          |
| IS608              | 1 (1)          |
| IS5                | 1 (0)          |
| IS26               | 2 (0)          |
| ISCro1             | 1 (1)          |
| ISSfl4             | 1 (0)          |
| IS621              | 7 (0)          |
| IS609              | 3 (2)          |
| IS1414             | 1 (1)          |
| IS604              | 1 (1)          |
| IS677              | 10 (8)         |
| ISEc25             | 2 (1)          |
| IS3 family         | 4 (4)          |
| IS66 family        | 2 (2)          |
| IS91 family        | 1 (1)          |
| IS110 family       | 1 (1)          |
| IS200/IS605 family | 1 (1)          |
| IS 256 family      | 1 (1)          |
| IS481 family       | 1 (1)          |
| ISAs1 family       | 1 (1)          |
| <b>Total</b>       | <b>52 (33)</b> |

\* Numbers of truncated and deleted copies are shown in parentheses.

**Supplementary Table S3.** The 356 conserved hypothetical genes and 284 genes with assigned function that are present in SE11 but absent in MG1655

| Gene ID   | Gene product                                               | Presence in E24377A* |
|-----------|------------------------------------------------------------|----------------------|
| ECSE_0018 | conserved hypothetical protein                             | +                    |
| ECSE_0019 | conserved hypothetical protein                             | -                    |
| ECSE_0020 | conserved hypothetical protein                             | +                    |
| ECSE_0030 | conserved hypothetical protein                             | -                    |
| ECSE_0031 | conserved hypothetical protein                             | -                    |
| ECSE_0034 | conserved hypothetical protein                             | +                    |
| ECSE_0081 | conserved hypothetical protein                             | +                    |
| ECSE_0150 | conserved hypothetical protein                             | +                    |
| ECSE_0194 | conserved hypothetical protein                             | -                    |
| ECSE_0239 | conserved hypothetical protein                             | -                    |
| ECSE_0249 | conserved hypothetical protein                             | +                    |
| ECSE_0251 | putative motility protein                                  | +                    |
| ECSE_0252 | flagellar biosynthetic protein                             | +                    |
| ECSE_0255 | conserved hypothetical protein                             | +                    |
| ECSE_0256 | peptide chain release factor                               | +                    |
| ECSE_0316 | putative invasins                                          | +                    |
| ECSE_0317 | putative transcription regulator                           | +                    |
| ECSE_0318 | putative dehydrogenase                                     | +                    |
| ECSE_0327 | putative autotransporter                                   | -                    |
| ECSE_0328 | conserved hypothetical protein                             | -                    |
| ECSE_0329 | conserved hypothetical protein                             | -                    |
| ECSE_0330 | conserved hypothetical protein                             | -                    |
| ECSE_0345 | conserved hypothetical protein                             | +                    |
| ECSE_0346 | putative sugar ABC transporter substrate binding component | +                    |
| ECSE_0347 | putative sugar ABC transporter ATP-binding component       | +                    |
| ECSE_0348 | putative sugar ABC transporter permease component          | +                    |
| ECSE_0349 | putative sugar ABC transporter permease component          | +                    |
| ECSE_0366 | putative truncated cyanate transport protein               | -                    |
| ECSE_0384 | putative transferase                                       | +                    |
| ECSE_0392 | conserved hypothetical protein                             | -                    |
| ECSE_0393 | putative autotransporter                                   | +                    |
| ECSE_0396 | conserved hypothetical protein                             | +                    |
| ECSE_0402 | conserved hypothetical protein                             | +                    |
| ECSE_0413 | conserved hypothetical protein                             | +                    |
| ECSE_0421 | conserved hypothetical protein                             | +                    |
| ECSE_0432 | conserved hypothetical protein                             | +                    |
| ECSE_0450 | conserved hypothetical protein                             | +                    |
| ECSE_0451 | conserved hypothetical protein                             | +                    |
| ECSE_0452 | conserved hypothetical protein                             | +                    |
| ECSE_0461 | conserved hypothetical protein                             | +                    |
| ECSE_0525 | putative truncated Rhs core protein                        | -                    |
| ECSE_0526 | putative truncated Rhs core protein                        | +                    |
| ECSE_0527 | conserved hypothetical protein                             | -                    |
| ECSE_0528 | conserved hypothetical protein                             | -                    |
| ECSE_0544 | conserved hypothetical protein                             | +                    |
| ECSE_0626 | conserved hypothetical protein                             | +                    |
| ECSE_0627 | conserved hypothetical protein                             | +                    |
| ECSE_0628 | conserved hypothetical protein                             | -                    |
| ECSE_0629 | putative truncated Rhs core protein                        | -                    |
| ECSE_0630 | conserved hypothetical protein                             | -                    |
| ECSE_0631 | Rhs core protein                                           | +                    |
| ECSE_0632 | conserved hypothetical protein                             | +                    |
| ECSE_0633 | conserved hypothetical protein                             | +                    |
| ECSE_0646 | conserved hypothetical protein                             | -                    |
| ECSE_0677 | conserved hypothetical protein                             | +                    |
| ECSE_0693 | conserved hypothetical protein                             | +                    |
| ECSE_0700 | conserved hypothetical protein                             | +                    |
| ECSE_0719 | putative truncated dnaK protein                            | -                    |
| ECSE_0726 | conserved hypothetical protein                             | +                    |
| ECSE_0727 | conserved hypothetical protein                             | +                    |
| ECSE_0742 | conserved hypothetical protein                             | +                    |
| ECSE_0753 | conserved hypothetical protein                             | +                    |
| ECSE_0762 | putative truncated Rhs core protein                        | +                    |
| ECSE_0765 | conserved hypothetical protein                             | -                    |
| ECSE_0779 | conserved hypothetical protein                             | -                    |
| ECSE_0792 | conserved hypothetical protein                             | -                    |
| ECSE_0841 | conserved hypothetical protein                             | -                    |
| ECSE_0853 | conserved hypothetical protein                             | +                    |
| ECSE_0871 | conserved hypothetical protein                             | -                    |
| ECSE_0873 | conserved hypothetical protein                             | +                    |
| ECSE_0941 | conserved hypothetical protein                             | -                    |
| ECSE_0956 | conserved hypothetical protein                             | +                    |

|           |                                                     |   |
|-----------|-----------------------------------------------------|---|
| ECSE_1019 | conserved hypothetical protein                      | + |
| ECSE_1033 | conserved hypothetical protein                      | - |
| ECSE_1077 | conserved hypothetical protein                      | - |
| ECSE_1081 | putative cytochrome                                 | + |
| ECSE_1084 | conserved hypothetical protein                      | + |
| ECSE_1093 | conserved hypothetical protein                      | + |
| ECSE_1103 | conserved hypothetical protein                      | + |
| ECSE_1111 | conserved hypothetical protein                      | + |
| ECSE_1167 | conserved hypothetical protein                      | + |
| ECSE_1187 | conserved hypothetical protein                      | - |
| ECSE_1213 | conserved hypothetical protein                      | + |
| ECSE_1214 | conserved hypothetical protein                      | + |
| ECSE_1215 | putative autotransporter                            | + |
| ECSE_1219 | putative truncated autotransporter                  | + |
| ECSE_1223 | conserved hypothetical protein                      | - |
| ECSE_1229 | putative truncated cytolysin                        | - |
| ECSE_1252 | conserved hypothetical protein                      | + |
| ECSE_1266 | conserved hypothetical protein                      | + |
| ECSE_1267 | conserved hypothetical protein                      | - |
| ECSE_1276 | conserved hypothetical protein                      | + |
| ECSE_1331 | conserved hypothetical protein                      | + |
| ECSE_1370 | putative ABC transporter ATP-binding component      | + |
| ECSE_1379 | conserved hypothetical protein                      | + |
| ECSE_1380 | conserved hypothetical protein                      | + |
| ECSE_1462 | conserved hypothetical protein                      | + |
| ECSE_1492 | putative truncated phosphatidate cytidyltransferase | - |
| ECSE_1499 | glyceraldehyde-3-phosphate dehydrogenase            | + |
| ECSE_1502 | conserved hypothetical protein                      | - |
| ECSE_1518 | conserved hypothetical protein                      | + |
| ECSE_1519 | conserved hypothetical protein                      | - |
| ECSE_1527 | putative acetyltransferase                          | - |
| ECSE_1539 | conserved hypothetical protein                      | + |
| ECSE_1540 | conserved hypothetical protein                      | + |
| ECSE_1541 | Rhs core protein                                    | + |
| ECSE_1542 | conserved hypothetical protein                      | + |
| ECSE_1543 | H repeat-associated protein                         | - |
| ECSE_1544 | H repeat-associated protein                         | - |
| ECSE_1545 | conserved hypothetical protein                      | - |
| ECSE_1547 | Rhs core protein                                    | - |
| ECSE_1548 | conserved hypothetical protein                      | - |
| ECSE_1549 | H repeat-associated protein                         | - |
| ECSE_1560 | putative outer membrane porin protein               | + |
| ECSE_1562 | truncated formate dehydrogenase-N alpha subunit     | - |
| ECSE_1590 | conserved hypothetical protein                      | - |
| ECSE_1595 | putative fimbrial usher protein                     | - |
| ECSE_1596 | putative fimbrial chaperone                         | + |
| ECSE_1597 | putative fimbrial protein                           | - |
| ECSE_1623 | 6-phospho-beta-glucosidase                          | + |
| ECSE_1624 | conserved hypothetical protein                      | + |
| ECSE_1625 | PTS system cellobiose-specific IIA component        | + |
| ECSE_1626 | PTS system cellobiose-specific IIC component        | + |
| ECSE_1627 | PTS system cellobiose-specific IIB component        | + |
| ECSE_1628 | putative transcriptional regulator                  | + |
| ECSE_1639 | putative transport protein                          | + |
| ECSE_1737 | glucuronide transport protein                       | + |
| ECSE_1756 | conserved hypothetical protein                      | - |
| ECSE_1778 | conserved hypothetical protein                      | + |
| ECSE_1797 | conserved hypothetical protein                      | + |
| ECSE_1820 | conserved hypothetical protein                      | + |
| ECSE_1827 | conserved hypothetical protein                      | + |
| ECSE_1888 | conserved hypothetical protein                      | - |
| ECSE_1889 | conserved hypothetical protein                      | - |
| ECSE_1900 | conserved hypothetical protein                      | - |
| ECSE_1919 | conserved hypothetical protein                      | + |
| ECSE_1967 | conserved hypothetical protein                      | + |
| ECSE_2028 | conserved hypothetical protein                      | - |
| ECSE_2137 | conserved hypothetical protein                      | + |
| ECSE_2145 | conserved hypothetical protein                      | + |
| ECSE_2163 | conserved hypothetical protein                      | - |
| ECSE_2167 | conserved hypothetical protein                      | - |
| ECSE_2194 | putative porin                                      | - |
| ECSE_2266 | conserved hypothetical protein                      | + |
| ECSE_2271 | conserved hypothetical protein                      | - |
| ECSE_2278 | conserved hypothetical protein                      | + |
| ECSE_2279 | putative propanediol utilization protein            | + |
| ECSE_2304 | putative glycosyl transferase                       | - |

|           |                                                      |   |
|-----------|------------------------------------------------------|---|
| ECSE_2305 | putative glycosyltransferase                         | - |
| ECSE_2307 | putative glycosyltransferase                         | - |
| ECSE_2308 | phosphomannomutase                                   | - |
| ECSE_2309 | GDP-mannose pyrophosphorylase                        | - |
| ECSE_2310 | GDP-mannose mannosyl hydrolase                       | - |
| ECSE_2311 | GDP-mannose-4-keto-6-D epimerase                     | - |
| ECSE_2312 | GDP-mannose 4,6-dehydratase                          | - |
| ECSE_2313 | putative glycosyltransferase                         | - |
| ECSE_2354 | conserved hypothetical protein                       | + |
| ECSE_2355 | conserved hypothetical protein                       | + |
| ECSE_2359 | galactitol utilization operon repressor              | + |
| ECSE_2384 | conserved hypothetical protein                       | + |
| ECSE_2390 | conserved hypothetical protein                       | + |
| ECSE_2406 | putative channel protein                             | + |
| ECSE_2423 | conserved hypothetical protein                       | + |
| ECSE_2438 | conserved hypothetical protein                       | + |
| ECSE_2458 | putative truncated autotransporter                   | - |
| ECSE_2459 | putative autotransporter                             | + |
| ECSE_2489 | conserved hypothetical protein                       | + |
| ECSE_2499 | conserved hypothetical protein                       | + |
| ECSE_2502 | conserved hypothetical protein                       | + |
| ECSE_2553 | conserved hypothetical protein                       | + |
| ECSE_2563 | conserved hypothetical protein                       | - |
| ECSE_2614 | conserved hypothetical protein                       | - |
| ECSE_2647 | putative fimbrial usher protein                      | + |
| ECSE_2656 | conserved hypothetical protein                       | + |
| ECSE_2658 | sucrose transport protein                            | + |
| ECSE_2659 | fructokinase                                         | + |
| ECSE_2660 | sucrose hydrolase                                    | + |
| ECSE_2661 | sucrose operon repressor                             | + |
| ECSE_2662 | conserved hypothetical protein                       | + |
| ECSE_2695 | conserved hypothetical protein                       | - |
| ECSE_2758 | conserved hypothetical protein                       | - |
| ECSE_2759 | conserved hypothetical protein                       | + |
| ECSE_2768 | putative hydrogenase 4 membrane subunit              | - |
| ECSE_2790 | conserved hypothetical protein                       | - |
| ECSE_2865 | conserved hypothetical protein                       | - |
| ECSE_2877 | conserved hypothetical protein                       | + |
| ECSE_2906 | conserved hypothetical protein                       | - |
| ECSE_2907 | histidin kinase-like protein                         | - |
| ECSE_2910 | conserved hypothetical protein                       | + |
| ECSE_2911 | conserved hypothetical protein                       | + |
| ECSE_2933 | conserved hypothetical protein                       | + |
| ECSE_2934 | conserved hypothetical protein                       | + |
| ECSE_2989 | conserved hypothetical protein                       | + |
| ECSE_2990 | conserved hypothetical protein                       | + |
| ECSE_2991 | putative phenylacrylic acid decarboxylase            | + |
| ECSE_2992 | transcriptional regulator                            | + |
| ECSE_3011 | conserved hypothetical protein                       | + |
| ECSE_3014 | conserved hypothetical protein                       | + |
| ECSE_3017 | conserved hypothetical protein                       | - |
| ECSE_3035 | conserved hypothetical protein                       | + |
| ECSE_3106 | conserved hypothetical protein                       | + |
| ECSE_3108 | conserved hypothetical protein                       | - |
| ECSE_3112 | conserved hypothetical protein                       | + |
| ECSE_3113 | conserved hypothetical protein                       | - |
| ECSE_3114 | conserved hypothetical protein                       | + |
| ECSE_3115 | conserved hypothetical protein                       | - |
| ECSE_3116 | conserved hypothetical protein                       | + |
| ECSE_3117 | conserved hypothetical protein                       | - |
| ECSE_3118 | putative lipoprotein of type III secretion apparatus | + |
| ECSE_3119 | putative type III secretion protein                  | - |
| ECSE_3120 | putative type III secretion protein                  | + |
| ECSE_3121 | putative type III secretion system regulator         | - |
| ECSE_3122 | putative type III secretion protein                  | - |
| ECSE_3123 | putative type III secretion protein                  | + |
| ECSE_3124 | putative type III secretion protein                  | + |
| ECSE_3125 | putative type III secretion protein                  | + |
| ECSE_3126 | putative type III secretion protein                  | + |
| ECSE_3127 | putative type III secretion protein                  | + |
| ECSE_3128 | conserved hypothetical protein                       | + |
| ECSE_3177 | conserved hypothetical protein                       | - |
| ECSE_3192 | conserved hypothetical protein                       | + |
| ECSE_3193 | conserved hypothetical protein                       | + |
| ECSE_3194 | cobalt ABC transporter permease component            | + |
| ECSE_3195 | cobalt ABC transporter ATP-binding component         | + |

|           |                                                         |   |
|-----------|---------------------------------------------------------|---|
| ECSE_3196 | cobalt ABC transporter ATP-binding component            | + |
| ECSE_3206 | conserved hypothetical protein                          | + |
| ECSE_3227 | conserved hypothetical protein                          | + |
| ECSE_3237 | putative type II secretion protein                      | + |
| ECSE_3239 | putative type II secretion protein                      | + |
| ECSE_3240 | putative type II secretion protein                      | + |
| ECSE_3241 | putative type II secretion protein                      | + |
| ECSE_3246 | putative type II secretion protein                      | + |
| ECSE_3250 | conserved hypothetical protein                          | + |
| ECSE_3259 | conserved hypothetical protein                          | + |
| ECSE_3260 | conserved hypothetical protein                          | + |
| ECSE_3261 | conserved hypothetical protein                          | + |
| ECSE_3262 | conserved hypothetical protein                          | + |
| ECSE_3263 | conserved hypothetical protein                          | + |
| ECSE_3264 | conserved hypothetical protein                          | + |
| ECSE_3265 | conserved hypothetical protein                          | + |
| ECSE_3266 | conserved hypothetical protein                          | + |
| ECSE_3267 | conserved hypothetical protein                          | + |
| ECSE_3284 | conserved hypothetical protein                          | + |
| ECSE_3288 | conserved hypothetical protein                          | + |
| ECSE_3291 | conserved hypothetical protein                          | - |
| ECSE_3302 | conserved hypothetical protein                          | - |
| ECSE_3321 | conserved hypothetical protein                          | + |
| ECSE_3325 | putative fimbrial usher protein                         | + |
| ECSE_3331 | conserved hypothetical protein                          | - |
| ECSE_3341 | conserved hypothetical protein                          | + |
| ECSE_3369 | conserved hypothetical protein                          | + |
| ECSE_3375 | putative fimbrial protein                               | + |
| ECSE_3376 | putative fimbrial usher protein                         | + |
| ECSE_3377 | putative fimbrial protein                               | + |
| ECSE_3378 | putative fimbrial protein                               | + |
| ECSE_3406 | conserved hypothetical protein                          | + |
| ECSE_3407 | conserved hypothetical protein                          | - |
| ECSE_3418 | PTS system N-acetylgalactosamine-specific IIC component | + |
| ECSE_3419 | PTS system N-acetylgalactosamine-specific IID component | + |
| ECSE_3420 | PTS system N-acetylgalactosamine-specific IIA component | + |
| ECSE_3421 | N-acetylgalactosamine-6-phosphate deacetylase           | + |
| ECSE_3496 | conserved hypothetical protein                          | - |
| ECSE_3524 | conserved hypothetical protein                          | - |
| ECSE_3531 | conserved hypothetical protein                          | + |
| ECSE_3534 | conserved hypothetical protein                          | - |
| ECSE_3550 | amino acid ABC transporter substrate binding component  | + |
| ECSE_3659 | conserved hypothetical protein                          | + |
| ECSE_3665 | conserved hypothetical protein                          | + |
| ECSE_3667 | conserved hypothetical protein                          | - |
| ECSE_3668 | conserved hypothetical protein                          | - |
| ECSE_3673 | conserved hypothetical protein                          | + |
| ECSE_3677 | conserved hypothetical protein                          | - |
| ECSE_3693 | conserved hypothetical protein                          | + |
| ECSE_3694 | conserved hypothetical protein                          | + |
| ECSE_3695 | conserved hypothetical protein                          | + |
| ECSE_3696 | conserved hypothetical protein                          | + |
| ECSE_3711 | conserved hypothetical protein                          | + |
| ECSE_3725 | conserved hypothetical protein                          | + |
| ECSE_3750 | conserved hypothetical protein                          | + |
| ECSE_3755 | conserved hypothetical protein                          | + |
| ECSE_3770 | conserved hypothetical protein                          | + |
| ECSE_3771 | conserved hypothetical protein                          | + |
| ECSE_3772 | conserved hypothetical protein                          | + |
| ECSE_3773 | conserved hypothetical protein                          | + |
| ECSE_3803 | conserved hypothetical protein                          | + |
| ECSE_3808 | conserved hypothetical protein                          | + |
| ECSE_3809 | conserved hypothetical protein                          | - |
| ECSE_3811 | conserved hypothetical protein                          | + |
| ECSE_3818 | conserved hypothetical protein                          | + |
| ECSE_3844 | truncated xylose operon regulator                       | - |
| ECSE_3864 | conserved hypothetical protein                          | + |
| ECSE_3872 | putative truncated Rhs core protein                     | + |
| ECSE_3878 | conserved hypothetical protein                          | - |
| ECSE_3883 | conserved hypothetical protein                          | + |
| ECSE_3884 | putative autotransporter                                | + |
| ECSE_3894 | conserved hypothetical protein                          | - |
| ECSE_3905 | lipid A-core:surface polymer ligase                     | - |
| ECSE_3906 | lipopolysaccharide 1,2-N- acetylglucosaminetransferase  | - |
| ECSE_3925 | conserved hypothetical protein                          | + |
| ECSE_3929 | conserved hypothetical protein                          | - |

|           |                                                                 |   |
|-----------|-----------------------------------------------------------------|---|
| ECSE_3935 | conserved hypothetical protein                                  | + |
| ECSE_3967 | truncated 6-phospho-alpha-glucosidase                           | - |
| ECSE_3968 | truncated 6-phospho-alpha-glucosidase                           | - |
| ECSE_3969 | putative PTS system component                                   | + |
| ECSE_4015 | putative fimbrial protein LpfD                                  | + |
| ECSE_4016 | putative fimbrial usher protein LpfC                            | + |
| ECSE_4017 | putative fimbrial chaperone LpfB                                | + |
| ECSE_4018 | putative fimbrial protein LpfA                                  | + |
| ECSE_4049 | conserved hypothetical protein                                  | - |
| ECSE_4051 | acetolactate synthase II large subunit                          | + |
| ECSE_4059 | conserved hypothetical protein                                  | + |
| ECSE_4064 | rho operon leader peptide                                       | - |
| ECSE_4066 | conserved hypothetical protein                                  | + |
| ECSE_4081 | conserved hypothetical protein                                  | + |
| ECSE_4082 | conserved hypothetical protein                                  | + |
| ECSE_4089 | conserved hypothetical protein                                  | + |
| ECSE_4090 | conserved hypothetical protein                                  | + |
| ECSE_4091 | conserved hypothetical protein                                  | - |
| ECSE_4092 | conserved hypothetical protein                                  | - |
| ECSE_4094 | conserved hypothetical protein                                  | + |
| ECSE_4103 | conserved hypothetical protein                                  | + |
| ECSE_4104 | conserved hypothetical protein                                  | + |
| ECSE_4105 | conserved hypothetical protein                                  | - |
| ECSE_4106 | conserved hypothetical protein                                  | - |
| ECSE_4144 | conserved hypothetical protein                                  | + |
| ECSE_4146 | conserved hypothetical protein                                  | - |
| ECSE_4172 | putative lipase                                                 | + |
| ECSE_4173 | conserved hypothetical protein                                  | + |
| ECSE_4174 | conserved hypothetical protein                                  | + |
| ECSE_4181 | truncated formate dehydrogenase major subunit                   | - |
| ECSE_4193 | conserved hypothetical protein                                  | + |
| ECSE_4205 | conserved hypothetical protein                                  | - |
| ECSE_4226 | Rhs core protein                                                | + |
| ECSE_4254 | starvation sensing protein                                      | + |
| ECSE_4255 | putative transport protein                                      | + |
| ECSE_4266 | conserved hypothetical protein                                  | + |
| ECSE_4291 | conserved hypothetical protein                                  | + |
| ECSE_4296 | conserved hypothetical protein                                  | + |
| ECSE_4310 | conserved hypothetical protein                                  | + |
| ECSE_4311 | conserved hypothetical protein                                  | + |
| ECSE_4312 | conserved hypothetical protein                                  | + |
| ECSE_4319 | conserved hypothetical protein                                  | + |
| ECSE_4320 | conserved hypothetical protein                                  | + |
| ECSE_4329 | conserved hypothetical protein                                  | - |
| ECSE_4330 | conserved hypothetical protein                                  | - |
| ECSE_4358 | conserved hypothetical protein                                  | + |
| ECSE_4372 | conserved hypothetical protein                                  | - |
| ECSE_4376 | truncated formate dehydrogenase H                               | - |
| ECSE_4402 | phosphonate ABC transporter permease component                  | + |
| ECSE_4428 | conserved hypothetical protein                                  | - |
| ECSE_4477 | conserved hypothetical protein                                  | + |
| ECSE_4497 | conserved hypothetical protein                                  | - |
| ECSE_4503 | putative dicarboxylate-binding periplasmic protein              | + |
| ECSE_4504 | putative transport protein                                      | + |
| ECSE_4505 | conserved hypothetical protein                                  | - |
| ECSE_4506 | putative oxidoreductase                                         | + |
| ECSE_4507 | coenzyme A transferase                                          | + |
| ECSE_4508 | conserved hypothetical protein                                  | + |
| ECSE_4509 | conserved hypothetical protein                                  | + |
| ECSE_4510 | conserved hypothetical protein                                  | + |
| ECSE_4511 | conserved hypothetical protein                                  | + |
| ECSE_4524 | conserved hypothetical protein                                  | + |
| ECSE_4532 | conserved hypothetical protein                                  | + |
| ECSE_4541 | cytochrome b562                                                 | + |
| ECSE_4547 | conserved hypothetical protein                                  | - |
| ECSE_4549 | conserved hypothetical protein                                  | - |
| ECSE_4559 | conserved hypothetical protein                                  | - |
| ECSE_4574 | putative restriction endonuclease                               | - |
| ECSE_4577 | conserved hypothetical protein                                  | - |
| ECSE_4578 | putative 3'-phosphoadenosine 5'-phosphosulfate sulfotransferase | - |
| ECSE_4579 | conserved hypothetical protein                                  | - |
| ECSE_4599 | conserved hypothetical protein                                  | - |
| ECSE_4605 | conserved hypothetical protein                                  | + |
| ECSE_4613 | conserved hypothetical protein                                  | - |
| ECSE_4616 | penicillin G acylase                                            | - |
| ECSE_4620 | 4-hydroxyphenylacetate 3-monooxygenase small subunit            | - |

|              |                                                                 |   |
|--------------|-----------------------------------------------------------------|---|
| ECSE_4621    | 4-hydroxyphenylacetate 3-monooxygenase large subunit            | - |
| ECSE_4622    | 4-hydroxyphenylacetate 3-monooxygenase operon regulator         | - |
| ECSE_4623    | putative 4-hydroxyphenylacetate transport protein               | - |
| ECSE_4624    | 2,4-dihydroxyhept-2-ene-1,7-dioic acid aldolase                 | - |
| ECSE_4625    | 2-oxo-hept-3-ene-1,7-dioate hydratase                           | - |
| ECSE_4626    | 5-carboxymethyl-2-hydroxymuconate isomerase                     | - |
| ECSE_4627    | 3,4-dihydroxyphenylacetate 2,3-dioxygenase                      | - |
| ECSE_4628    | 5-carboxy-2-hydroxymuconate semialdehyde dehydrogenase          | - |
| ECSE_4629    | 5-oxo-1,2,5-tricarboxilic-3-penten acid decarboxilase/isomerase | - |
| ECSE_4630    | homoprotocatechuate degradative operon repressor                | - |
| ECSE_4660    | conserved hypothetical protein                                  | - |
| ECSE_P1-0001 | replication initiation protein                                  | + |
| ECSE_P1-0002 | conserved hypothetical protein                                  | + |
| ECSE_P1-0003 | conserved hypothetical protein                                  | + |
| ECSE_P1-0004 | conserved hypothetical protein                                  | - |
| ECSE_P1-0005 | conserved hypothetical protein                                  | - |
| ECSE_P1-0006 | conserved hypothetical protein                                  | - |
| ECSE_P1-0007 | truncated YafB protein                                          | - |
| ECSE_P1-0010 | tetracycline repressor protein TetR                             | - |
| ECSE_P1-0011 | tetracycline resistance structural protein TetA                 | - |
| ECSE_P1-0014 | putative resolvase                                              | - |
| ECSE_P1-0017 | truncated YafB protein                                          | - |
| ECSE_P1-0018 | conserved hypothetical protein                                  | - |
| ECSE_P1-0019 | colicin protein                                                 | - |
| ECSE_P1-0020 | colicin immunity protein                                        | - |
| ECSE_P1-0021 | conserved hypothetical protein                                  | + |
| ECSE_P1-0022 | conserved hypothetical protein                                  | + |
| ECSE_P1-0023 | conserved hypothetical protein                                  | - |
| ECSE_P1-0025 | conserved hypothetical protein                                  | - |
| ECSE_P1-0026 | conserved hypothetical protein                                  | - |
| ECSE_P1-0028 | conserved hypothetical protein                                  | - |
| ECSE_P1-0029 | conserved hypothetical protein                                  | - |
| ECSE_P1-0030 | conserved hypothetical protein                                  | - |
| ECSE_P1-0031 | abortive infection protein                                      | - |
| ECSE_P1-0032 | conserved hypothetical protein                                  | - |
| ECSE_P1-0033 | conserved hypothetical protein                                  | - |
| ECSE_P1-0034 | conserved hypothetical protein                                  | - |
| ECSE_P1-0035 | conserved hypothetical protein                                  | - |
| ECSE_P1-0036 | resolvase                                                       | + |
| ECSE_P1-0037 | conserved hypothetical protein                                  | + |
| ECSE_P1-0038 | conserved hypothetical protein                                  | + |
| ECSE_P1-0039 | ParA protein                                                    | + |
| ECSE_P1-0040 | ParB protein                                                    | + |
| ECSE_P1-0041 | ImpB protein                                                    | - |
| ECSE_P1-0042 | ImpA protein                                                    | - |
| ECSE_P1-0043 | ImpC protein                                                    | - |
| ECSE_P1-0044 | conserved hypothetical protein                                  | - |
| ECSE_P1-0045 | conserved hypothetical protein                                  | + |
| ECSE_P1-0046 | conserved hypothetical protein                                  | - |
| ECSE_P1-0047 | conserved hypothetical protein                                  | + |
| ECSE_P1-0048 | conserved hypothetical protein                                  | - |
| ECSE_P1-0049 | conserved hypothetical protein                                  | - |
| ECSE_P1-0050 | conserved hypothetical protein                                  | + |
| ECSE_P1-0051 | conserved hypothetical protein                                  | - |
| ECSE_P1-0052 | conserved hypothetical protein                                  | + |
| ECSE_P1-0053 | conserved hypothetical protein                                  | + |
| ECSE_P1-0054 | conserved hypothetical protein                                  | - |
| ECSE_P1-0055 | conserved hypothetical protein                                  | - |
| ECSE_P1-0056 | single-stranded DNA binding protein Ssb                         | - |
| ECSE_P1-0057 | conserved hypothetical protein                                  | - |
| ECSE_P1-0058 | conserved hypothetical protein                                  | - |
| ECSE_P1-0059 | plasmid SOS inhibition protein PsiB                             | + |
| ECSE_P1-0060 | plasmid SOS inhibition protein PsiA                             | + |
| ECSE_P1-0061 | conserved hypothetical protein                                  | + |
| ECSE_P1-0062 | anti-restriction protein                                        | + |
| ECSE_P1-0063 | conserved hypothetical protein                                  | - |
| ECSE_P1-0064 | conserved hypothetical protein                                  | - |
| ECSE_P1-0065 | conserved hypothetical protein                                  | + |
| ECSE_P1-0066 | conserved hypothetical protein                                  | + |
| ECSE_P1-0067 | conserved hypothetical protein                                  | + |
| ECSE_P1-0068 | conserved hypothetical protein                                  | + |
| ECSE_P1-0069 | conserved hypothetical protein                                  | + |
| ECSE_P1-0070 | conserved hypothetical protein                                  | - |
| ECSE_P1-0071 | conserved hypothetical protein                                  | + |
| ECSE_P1-0072 | conserved hypothetical protein                                  | + |
| ECSE_P1-0073 | relaxosome component NikA                                       | - |



|              |                                       |   |
|--------------|---------------------------------------|---|
| ECSE_P1-0074 | relaxase NikB                         | + |
| ECSE_P1-0075 | TrbC protein                          | + |
| ECSE_P1-0076 | TrbB protein                          | - |
| ECSE_P1-0077 | TrbA protein                          | - |
| ECSE_P1-0078 | plasmid stability protein             | - |
| ECSE_P1-0079 | conserved hypothetical protein        | - |
| ECSE_P1-0080 | conserved hypothetical protein        | - |
| ECSE_P1-0081 | conserved hypothetical protein        | - |
| ECSE_P1-0082 | putative regulator protein            | + |
| ECSE_P1-0083 | surface exclusion protein ExcA        | - |
| ECSE_P1-0084 | TraY protein                          | - |
| ECSE_P1-0085 | TraX protein                          | - |
| ECSE_P1-0086 | TraW protein                          | - |
| ECSE_P1-0087 | TraV protein                          | - |
| ECSE_P1-0088 | TraU protein                          | - |
| ECSE_P1-0089 | TraT protein                          | - |
| ECSE_P1-0090 | TraS protein                          | - |
| ECSE_P1-0091 | TraR protein                          | - |
| ECSE_P1-0092 | TraQ protein                          | - |
| ECSE_P1-0093 | TraP protein                          | - |
| ECSE_P1-0094 | TraO protein                          | - |
| ECSE_P1-0095 | TraN protein                          | - |
| ECSE_P1-0096 | TraM protein                          | - |
| ECSE_P1-0097 | TraL protein                          | - |
| ECSE_P1-0098 | DNA primase SogL                      | - |
| ECSE_P1-0099 | endonuclease                          | - |
| ECSE_P1-0100 | TraK protein                          | - |
| ECSE_P1-0101 | TraJ protein                          | - |
| ECSE_P1-0102 | TraI protein                          | - |
| ECSE_P1-0103 | TraH protein                          | - |
| ECSE_P1-0104 | TraG protein                          | - |
| ECSE_P1-0105 | TraF protein                          | - |
| ECSE_P1-0106 | TraE protein                          | - |
| ECSE_P1-0107 | shufflon protein                      | - |
| ECSE_P1-0108 | prepilin peptidase PilU               | - |
| ECSE_P1-0109 | PilT protein                          | - |
| ECSE_P1-0110 | type IV prepilin PilS                 | - |
| ECSE_P1-0111 | PilR protein                          | - |
| ECSE_P1-0112 | ATP-binding protein PilQ              | - |
| ECSE_P1-0113 | pilus assembly protein PilP           | - |
| ECSE_P1-0114 | PilO protein                          | - |
| ECSE_P1-0115 | lipoprotein PilN                      | - |
| ECSE_P1-0116 | PilM protein                          | + |
| ECSE_P1-0117 | lipoprotein PilL                      | + |
| ECSE_P1-0118 | PilK protein                          | - |
| ECSE_P1-0119 | PilJ protein                          | - |
| ECSE_P1-0120 | PilI protein                          | - |
| ECSE_P1-0121 | TraD protein                          | - |
| ECSE_P1-0122 | TraC protein                          | + |
| ECSE_P1-0123 | TraB protein                          | + |
| ECSE_P1-0124 | TraA protein                          | - |
| ECSE_P2-0001 | putative F1 capsule chaperone         | + |
| ECSE_P2-0002 | putative F1 capsule anchoring protein | - |
| ECSE_P2-0003 | putative F1 capsule antigen protein   | - |
| ECSE_P2-0004 | putative F1 capsule antigen protein   | - |
| ECSE_P2-0005 | putative F1 capsule antigen protein   | - |
| ECSE_P2-0006 | conserved hypothetical protein        | - |
| ECSE_P2-0008 | conserved hypothetical protein        | + |
| ECSE_P2-0010 | conserved hypothetical protein        | + |
| ECSE_P2-0011 | plasmid maintenance protein CcdB      | + |
| ECSE_P2-0012 | resolvase                             | + |
| ECSE_P2-0013 | replication protein RepB              | - |
| ECSE_P2-0014 | partitioning protein ParA             | + |
| ECSE_P2-0015 | partitioning protein ParB             | + |
| ECSE_P2-0016 | truncated UV protection protein ImpB  | - |
| ECSE_P2-0020 | conserved hypothetical protein        | - |
| ECSE_P2-0021 | conserved hypothetical protein        | - |
| ECSE_P2-0022 | conserved hypothetical protein        | - |
| ECSE_P2-0023 | truncated UV protection protein ImpB  | - |
| ECSE_P2-0024 | UV protection protein ImpA            | - |
| ECSE_P2-0025 | conserved hypothetical protein        | - |
| ECSE_P2-0026 | conserved hypothetical protein        | - |
| ECSE_P2-0027 | conserved hypothetical protein        | - |
| ECSE_P2-0028 | conserved hypothetical protein        | + |
| ECSE_P2-0029 | conserved hypothetical protein        | + |
| ECSE_P2-0030 | conserved hypothetical protein        | + |

|              |                                                |   |
|--------------|------------------------------------------------|---|
| ECSE_P2-0031 | conserved hypothetical protein                 | - |
| ECSE_P2-0032 | conserved hypothetical protein                 | + |
| ECSE_P2-0033 | conserved hypothetical protein                 | + |
| ECSE_P2-0034 | conserved hypothetical protein                 | - |
| ECSE_P2-0035 | conserved hypothetical protein                 | - |
| ECSE_P2-0036 | conserved hypothetical protein                 | - |
| ECSE_P2-0037 | conserved hypothetical protein                 | + |
| ECSE_P2-0038 | conserved hypothetical protein                 | + |
| ECSE_P2-0041 | single-stranded DNA binding protein            | + |
| ECSE_P2-0042 | conserved hypothetical protein                 | + |
| ECSE_P2-0043 | conserved hypothetical protein                 | + |
| ECSE_P2-0044 | plasmid SOS inhibition protein PsiB            | + |
| ECSE_P2-0045 | plasmid SOS inhibition protein PsiA            | + |
| ECSE_P2-0046 | conserved hypothetical protein                 | + |
| ECSE_P2-0049 | conserved hypothetical protein                 | + |
| ECSE_P2-0050 | conserved hypothetical protein                 | + |
| ECSE_P2-0051 | conserved hypothetical protein                 | + |
| ECSE_P2-0053 | conserved hypothetical protein                 | + |
| ECSE_P2-0054 | putative TraM protein                          | - |
| ECSE_P2-0058 | putative TraA protein                          | - |
| ECSE_P2-0059 | TraL protein                                   | + |
| ECSE_P2-0060 | TraE protein                                   | + |
| ECSE_P2-0061 | TraK protein                                   | - |
| ECSE_P2-0062 | TraB protein                                   | - |
| ECSE_P2-0063 | TraV protein                                   | - |
| ECSE_P2-0064 | TraC protein                                   | - |
| ECSE_P2-0065 | TrbI protein                                   | - |
| ECSE_P2-0066 | TraR protein                                   | + |
| ECSE_P2-0067 | TraW protein                                   | - |
| ECSE_P2-0068 | TraU protein                                   | - |
| ECSE_P2-0070 | TrbD protein                                   | - |
| ECSE_P2-0071 | TrbC protein                                   | - |
| ECSE_P2-0072 | TraN protein                                   | - |
| ECSE_P2-0073 | TraF protein                                   | - |
| ECSE_P2-0075 | TrbB protein                                   | - |
| ECSE_P2-0076 | TraH protein                                   | + |
| ECSE_P2-0077 | TraG protein                                   | + |
| ECSE_P2-0079 | TraT protein                                   | + |
| ECSE_P2-0081 | conserved hypothetical protein                 | + |
| ECSE_P2-0082 | TraD protein                                   | + |
| ECSE_P2-0083 | TraI protein                                   | - |
| ECSE_P2-0084 | TraX protein                                   | + |
| ECSE_P2-0085 | FinO protein                                   | + |
| ECSE_P2-0086 | conserved hypothetical protein                 | - |
| ECSE_P2-0087 | conserved hypothetical protein                 | + |
| ECSE_P2-0089 | replication protein                            | - |
| ECSE_P2-0090 | conserved hypothetical protein                 | - |
| ECSE_P2-0091 | replication initiation protein                 | - |
| ECSE_P2-0092 | conserved hypothetical protein                 | + |
| ECSE_P2-0093 | conserved hypothetical protein                 | + |
| ECSE_P2-0105 | conserved hypothetical protein                 | - |
| ECSE_P2-0106 | putative transcriptional regulator             | - |
| ECSE_P2-0107 | conserved hypothetical protein                 | - |
| ECSE_P2-0110 | conserved hypothetical protein                 | - |
| ECSE_P2-0111 | conserved hypothetical protein                 | - |
| ECSE_P2-0112 | conserved hypothetical protein                 | - |
| ECSE_P3-0001 | anaerobic sulfite reductase subunit A          | - |
| ECSE_P3-0002 | anaerobic sulfite reductase subunit B          | - |
| ECSE_P3-0003 | anaerobic sulfite reductase subunit C          | - |
| ECSE_P3-0004 | putative truncated xylanase/chitin deacetylase | + |
| ECSE_P3-0008 | conserved hypothetical protein                 | - |
| ECSE_P3-0009 | conserved hypothetical protein                 | - |
| ECSE_P3-0010 | conserved hypothetical protein                 | - |
| ECSE_P3-0011 | integrase                                      | - |
| ECSE_P3-0012 | replication protein RepA                       | - |
| ECSE_P3-0013 | conserved hypothetical protein                 | - |
| ECSE_P3-0016 | conserved hypothetical protein                 | + |
| ECSE_P3-0017 | conserved hypothetical protein                 | - |
| ECSE_P3-0021 | conserved hypothetical protein                 | - |
| ECSE_P3-0023 | putative cation transport protein              | - |
| ECSE_P3-0024 | thiosulfate reductase subunit A                | - |
| ECSE_P3-0025 | thiosulfate reductase iron-sulfur subunit      | - |
| ECSE_P3-0026 | thiosulfate reductase cytochrome b subunit     | - |
| ECSE_P3-0031 | fimbrial usher protein FaeD                    | - |
| ECSE_P3-0032 | fimbrial chaperone FaeE                        | - |
| ECSE_P3-0033 | fimbrial protein FaeF                          | - |

|              |                                        |   |
|--------------|----------------------------------------|---|
| ECSE_P3-0034 | fimbrial protein FaeG                  | - |
| ECSE_P3-0035 | fimbrial protein FaeH                  | - |
| ECSE_P3-0036 | fimbrial protein FaeI                  | - |
| ECSE_P3-0037 | fimbrial protein FaeJ                  | - |
| ECSE_P3-0038 | conserved hypothetical protein         | - |
| ECSE_P3-0044 | conserved hypothetical protein         | - |
| ECSE_P3-0045 | NAD-linked malate dehydrogenase        | - |
| ECSE_P3-0046 | choloyglycine hydrolase                | - |
| ECSE_P3-0048 | putative acetoin dehydrogenase         | - |
| ECSE_P3-0051 | conserved hypothetical protein         | + |
| ECSE_P3-0052 | conserved hypothetical protein         | + |
| ECSE_P3-0053 | conserved hypothetical protein         | - |
| ECSE_P3-0057 | putative transcription regulator       | - |
| ECSE_P3-0058 | putative transcription regulator       | - |
| ECSE_P3-0059 | conserved hypothetical protein         | - |
| ECSE_P3-0060 | putative fimbrial usher protein        | - |
| ECSE_P3-0061 | putative fimbrial chaperone            | - |
| ECSE_P3-0062 | putative fimbrial chaperone            | - |
| ECSE_P3-0063 | putative fimbrial protein              | - |
| ECSE_P3-0064 | putative fimbrial protein              | - |
| ECSE_P3-0065 | putative fimbrial chaperone            | - |
| ECSE_P3-0066 | putative fimbrial protein              | - |
| ECSE_P4-0004 | mobilization protein MobB              | - |
| ECSE_P4-0005 | mobilization protein MobA              | + |
| ECSE_P4-0006 | mobilization protein MobC              | - |
| ECSE_P4-0007 | RNA I inhibition modulator protein Rom | - |
| ECSE_P4-0009 | conserved hypothetical protein         | - |
| ECSE_P4-0010 | conserved hypothetical protein         | - |
| ECSE_P5-0001 | mobilization protein MobA              | - |
| ECSE_P5-0002 | mobilization protein MobB              | - |
| ECSE_P5-0004 | conserved hypothetical protein         | - |
| ECSE_P5-0005 | conserved hypothetical protein         | - |
| ECSE_P5-0007 | conserved hypothetical protein         | - |
| ECSE_P6-0001 | replication protein                    | - |
| ECSE_P6-0002 | conserved hypothetical protein         | - |
| ECSE_P6-0003 | conserved hypothetical protein         | - |

\* "+" indicates genes that are shared with *E. coli* E24377A and may be specific to phylogenetic B1 group; "-" indicates genes not shared with *E. coli* E24377A.

**Supplementary Table S4.** The 118 genes present in MG1655 but absent in SE11

| Gene ID | Gene product                                                                          |
|---------|---------------------------------------------------------------------------------------|
| b4412   | toxic membrane protein, small                                                         |
| b0164   | predicted phosphatase                                                                 |
| b4586   | hypothetical protein                                                                  |
| b0228   | conserved protein                                                                     |
| b0232   | predicted antitoxin of the YafO-YafN toxin-antitoxin system                           |
| b0233   | predicted toxin of the YafO-YafN toxin-antitoxin system                               |
| b4504   | predicted protein                                                                     |
| b0295   | predicted protein                                                                     |
| b0342   | thiogalactoside acetyltransferase                                                     |
| b4637   | ryhB-regulated fur leader peptide                                                     |
| b0689   | predicted protein                                                                     |
| b4590   | hypothetical protein                                                                  |
| b4513   | potassium ion accessory transporter subunit                                           |
| b0702   | predicted inner membrane protein                                                      |
| b0706   | conserved protein                                                                     |
| b4515   | conserved protein                                                                     |
| b0816   | predicted protein                                                                     |
| b4592   | hypothetical protein                                                                  |
| b4594   | hypothetical protein                                                                  |
| b4419   | toxic polypeptide, small                                                              |
| b4423   | toxic polypeptide, small                                                              |
| b1228   | predicted protein                                                                     |
| b1229   | predicted protamine-like protein                                                      |
| b1268   | predicted inner membrane protein                                                      |
| b4428   | toxic polypeptide, small                                                              |
| b1420   | regulatory peptide                                                                    |
| b4532   | predicted protein                                                                     |
| b4598   | hypothetical protein                                                                  |
| b1460   | conserved protein                                                                     |
| b1509   | conserved protein                                                                     |
| b4599   | hypothetical protein                                                                  |
| b4601   | hypothetical protein                                                                  |
| b4602   | hypothetical protein                                                                  |
| b1715   | phenylalanyl-tRNA synthetase operon leader peptide                                    |
| b1932   | predicted acyltransferase                                                             |
| b2032   | lipopolysaccharide biosynthesis protein                                               |
| b2033   | predicted acyl transferase                                                            |
| b2034   | conserved protein                                                                     |
| b2035   | O-antigen polymerase                                                                  |
| b2036   | UDP-galactopyranose mutase, FAD/NAD(P)-binding                                        |
| b2038   | dTDP-4-deoxyrhamnose-3,5-epimerase                                                    |
| b2039   | glucose-1-phosphate thymidyltransferase                                               |
| b2040   | dTDP-4-dehydrorhamnose reductase subunit, NAD(P)-binding, of dTDP-L-rhamnose synthase |
| b2041   | dTDP-glucose 4,6 dehydratase, NAD(P)-binding                                          |
| b2071   | predicted protein                                                                     |
| b4542   | predicted protein                                                                     |
| b4502   | conserved protein                                                                     |
| b4604   | hypothetical protein                                                                  |
| b2219   | sensory histidine kinase in two-component regulatory system with AtoC                 |
| b2220   | fused response regulator of ato operon, in two-component system with AtoS             |
| b2221   | acetyl-CoA:acetoacetyl-CoA transferase, alpha subunit                                 |
| b2222   | acetyl-CoA:acetoacetyl-CoA transferase, beta subunit                                  |
| b2223   | short chain fatty acid transporter                                                    |
| b2224   | acetyl-CoA acetyltransferase                                                          |
| b4605   | hypothetical protein                                                                  |
| b4543   | predicted protein                                                                     |
| b2246   | predicted transporter                                                                 |
| b2247   | predicted enolase                                                                     |
| b2248   | predicted DNA-binding transcriptional regulator                                       |
| b2270   | conserved protein                                                                     |
| b2273   | predicted protein                                                                     |
| b2274   | predicted protein                                                                     |
| b2275   | predicted protein                                                                     |
| b2305   | conserved protein                                                                     |
| b4501   | response regulator inhibitor for tor operon                                           |

b2364 DNA-binding transcriptional dual regulator  
b2365 predicted transporter  
b2420 conserved protein  
b4606 hypothetical protein  
b2504 predicted protein  
b2598 pheA gene leader peptide  
b4548 predicted protein  
b2647 adhesin-like autotransporter  
b2756 predicted protein  
b2759 predicted protein  
b4610 hypothetical protein  
b2940 predicted protein  
b3020 predicted transporter subunit: periplasmic-binding component of ABC superfamily  
b3021 predicted DNA-binding transcriptional regulator  
b3022 predicted cyanide hydratase  
b3083 conserved protein  
b3214 periplasmic protein  
b3215 predicted periplasmic chaperone protein  
b3216 predicted outer membrane protein  
b3219 predicted transcriptional regulator  
b3322 part of gsp divergon involved in type II protein secretion  
b3323 general secretory pathway component, cryptic  
b3324 general secretory pathway component, cryptic  
b3329 predicted general secretory pathway component, cryptic  
b3330 general secretory pathway component, cryptic  
b3331 predicted general secretory pathway component, cryptic  
b3333 general secretory pathway component, cryptic  
b3334 general secretory pathway component, cryptic  
b3338 periplasmic endochitinase  
b4612 hypothetical protein  
b3483 predicted protein  
b3593 rhsA element core protein RshA  
b3622 O-antigen ligase  
b3623 lipopolysaccharide core biosynthesis  
b3624 lipopolysaccharide core biosynthesis protein  
b3628 UDP-D-galactose:(glucosyl)lipopolysaccharide-1,6-D-galactosyltransferase  
b3629 lipopolysaccharide core biosynthesis protein  
b4617 lexA-regulated predicted protein  
b4618 lexA-regulated toxic peptide  
b4557 predicted protein  
b3801 acrylsulfatase-like enzyme  
b3817 conserved inner membrane protein  
b3818 predicted inner membrane protein  
b4011 conserved protein  
b4620 hypothetical protein  
b4157 predicted protein  
b4158 conserved inner membrane protein  
b4204 predicted protein  
b4215 predicted protein  
b4264 DNA-binding transcriptional repressor, 5-gluconate-binding  
b4265 L-idonate and D-gluconate transporter  
b4266 5-keto-D-gluconate-5-reductase  
b4267 L-idonate 5-dehydrogenase, NAD-binding  
b4268 D-gluconate kinase, thermosensitive  
b4269 predicted alcohol dehydrogenase, Zn-dependent and NAD(P)-binding  
b4655 expressed protein  
b4565 predicted enzyme IIB component of PTS  
b4309 conserved protein  
b4345 5-methylcytosine-specific restriction enzyme McrBC, subunit McrC  
b4346 5-methylcytosine-specific restriction enzyme McrBC, subunit McrB  
b4347 conserved protein  
b4348 specificity determinant for hsdM and hsdR  
b4349 DNA methylase M  
b4350 endonuclease R  
b4351 methylated adenine and cytosine restriction protein  
b4385 predicted DNA-binding transcriptional regulator

---

**Supplementary Table S5.** The 62 poorly conserved genes between SE11 and MG1655

| SE11 gene | MG1655 gene | BLAST score ratio | Gene product                                                                   |
|-----------|-------------|-------------------|--------------------------------------------------------------------------------|
| ECSE_3015 | b2760       | 0.07              | conserved hypothetical protein                                                 |
| ECSE_3016 | b2761       | 0.15              | conserved hypothetical protein                                                 |
| ECSE_3012 | b2757       | 0.16              | conserved hypothetical protein                                                 |
| ECSE_3013 | b2758       | 0.16              | conserved hypothetical protein                                                 |
| ECSE_3238 | b3332       | 0.23              | putative type II secretion protein                                             |
| ECSE_1559 | b1470       | 0.26              | conserved hypothetical protein                                                 |
| ECSE_1432 | b1365       | 0.32              | phage DNA methylase/nuclease                                                   |
| ECSE_3597 | b3335       | 0.34              | putative leader peptidase                                                      |
| ECSE_2314 | b2037       | 0.34              | conserved hypothetical protein                                                 |
| ECSE_3907 | b3626       | 0.39              | putative UDP-glucose:(galactosyl) LPS alpha1,2-glucosyltransferase             |
| ECSE_2642 | b2332       | 0.39              | conserved hypothetical protein                                                 |
| ECSE_3245 | b3325       | 0.40              | putative type II secretion protein                                             |
| ECSE_3243 | b3327       | 0.42              | putative type II secretion protein                                             |
| ECSE_2154 | b1923       | 0.44              | flagellar protein FlhC                                                         |
| ECSE_0264 | b2349       | 0.45              | putative phage integrase                                                       |
| ECSE_0290 | b2634       | 0.46              | hypothetical phage protein                                                     |
| ECSE_2904 | b2622       | 0.47              | phage integrase                                                                |
| ECSE_0292 | b0251       | 0.49              | hypothetical phage protein                                                     |
| ECSE_4339 | b4047       | 0.49              | conserved hypothetical protein                                                 |
| ECSE_2644 | b2334       | 0.49              | putative fimbrial protein                                                      |
| ECSE_2645 | b2335       | 0.50              | putative fimbrial protein                                                      |
| ECSE_0297 | b2644       | 0.52              | hypothetical phage protein                                                     |
| ECSE_0289 | b0253       | 0.52              | conserved hypothetical protein                                                 |
| ECSE_2254 | b1570       | 0.54              | putative phage regulator                                                       |
| ECSE_3909 | b3627       | 0.54              | UDP-D-galactose:(glucosyl)lipopolysaccharide-alpha-1,3-D-galactosyltransferase |
| ECSE_3244 | b3326       | 0.56              | putative type II secretion protein                                             |
| ECSE_3908 | b3625       | 0.57              | lipopolysaccharide core biosynthesis protein                                   |
| ECSE_2643 | b2333       | 0.57              | putative fimbrial protein                                                      |
| ECSE_1696 | b1575       | 0.58              | hypothetical phage protein                                                     |
| ECSE_0294 | b0249       | 0.59              | conserved hypothetical protein                                                 |
| ECSE_3242 | b3328       | 0.59              | putative type II secretion protein                                             |
| ECSE_3403 | b3119       | 0.60              | threonine dehydratase operon activator protein                                 |
| ECSE_0135 | b0135       | 0.61              | putative fimbrial protein                                                      |
| ECSE_0862 | b0806       | 0.62              | conserved hypothetical protein                                                 |
| ECSE_1692 | b1571       | 0.62              | hypothetical phage protein                                                     |
| ECSE_0400 | b0380       | 0.64              | conserved hypothetical protein                                                 |
| ECSE_4558 | b4253       | 0.65              | conserved hypothetical protein                                                 |
| ECSE_4450 | b4148       | 0.67              | suppressor of groEL                                                            |
| ECSE_1959 | b1788       | 0.67              | conserved hypothetical protein                                                 |
| ECSE_3831 | b4455       | 0.67              | conserved hypothetical protein                                                 |
| ECSE_1676 | b1560       | 0.68              | hypothetical phage protein                                                     |
| ECSE_2012 | b1837       | 0.68              | conserved hypothetical protein                                                 |
| ECSE_0296 | b2643       | 0.69              | hypothetical phage protein                                                     |
| ECSE_0299 | b2646       | 0.69              | hypothetical phage protein                                                     |
| ECSE_2440 | b2171       | 0.69              | putative elongation factor                                                     |
| ECSE_1528 | b1445       | 0.69              | conserved hypothetical protein                                                 |
| ECSE_1600 | b1510       | 0.72              | putative autotransporter                                                       |
| ECSE_2531 | b2271       | 0.72              | conserved hypothetical protein                                                 |
| ECSE_1697 | b1576       | 0.72              | hypothetical phage protein                                                     |
| ECSE_3554 | b3279       | 0.73              | putative transferase                                                           |
| ECSE_3912 | b3632       | 0.73              | lipopolysaccharide core biosynthesis protein                                   |
| ECSE_2565 | b1158       | 0.74              | phage DNA invertase                                                            |
| ECSE_4354 | b4060       | 0.74              | conserved hypothetical protein                                                 |
| ECSE_0206 | b0210       | 0.75              | putative biotin synthesis protein                                              |
| ECSE_0122 | b0122       | 0.75              | conserved hypothetical protein                                                 |
| ECSE_3521 | b3242       | 0.75              | conserved hypothetical protein                                                 |
| ECSE_1188 | b1122       | 0.76              | conserved hypothetical protein                                                 |
| ECSE_1409 | b1355       | 0.76              | conserved hypothetical protein                                                 |
| ECSE_0298 | b2645       | 0.77              | hypothetical phage protein                                                     |
| ECSE_0295 | b0252       | 0.78              | hypothetical phage protein                                                     |
| ECSE_3651 | b3390       | 0.78              | shikimate kinase I                                                             |
| ECSE_3268 | b2983       | 0.79              | conserved hypothetical protein                                                 |

## **Supplementary Figure S1**

### **Phylogenetic analysis of SE11**

Phylogenetic tree of members of *E. coli* was built using the neighbor-joining method based on partial nucleotide sequences of seven housekeeping genes (*adk*, *fumC*, *gyrB*, *icd*, *mdh*, *purA*, and *recA*). Multiple alignments of concatenated sequences (3,423 nt) were carried out using ClustalW (a bootstrap trial of 1,000). Bootstrap values greater than 70% are indicated at the nodes. SE11 is shown by red, and other completely sequenced *E. coli* strains by blue. Scale bar represents the number of substitutions per site. Proposed *E. coli* phylogroups (four major groups, A, B1, B2, and D, and a minor group E) are indicated. Abbreviations: ETEC, enterotoxigenic *E. coli*; EHEC, enterohemorrhagic *E. coli*; UPEC, uropathogenic *E. coli*; APEC, avian pathogenic *E. coli*.

## **Supplementary Figure S2**

### **Comparisons of the genomic location of the large segment near the *aspV* in SE11 with the corresponding location of MG1655, O157, and UPEC 536 strains**

Genes and their orientations are depicted with arrows. Genes within the large segment in SE11 are shown by blue. Light blue bars indicate orthologous regions.

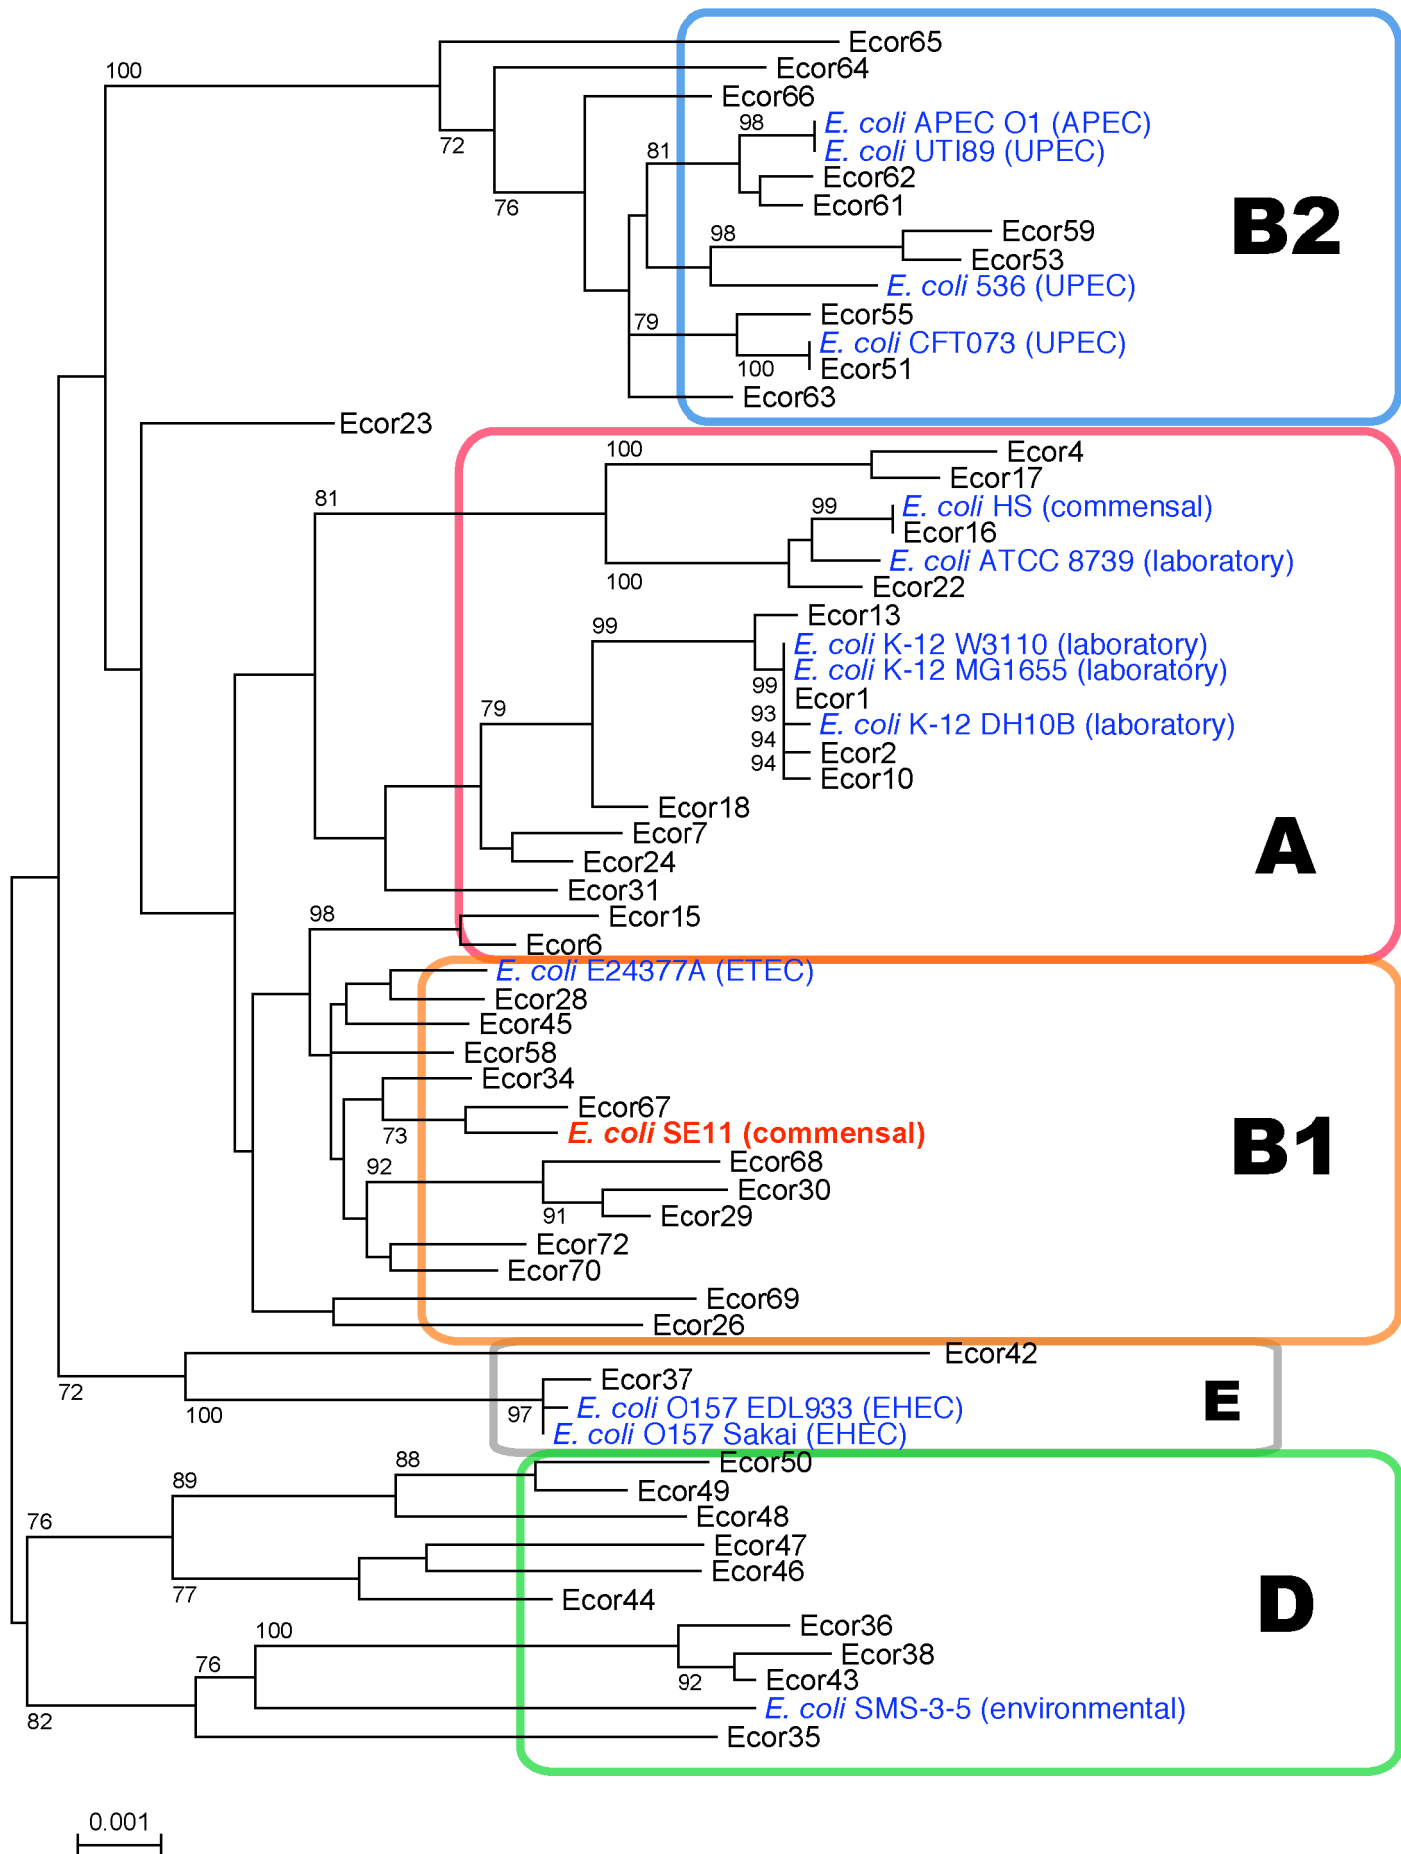

Supplementary Figure S1



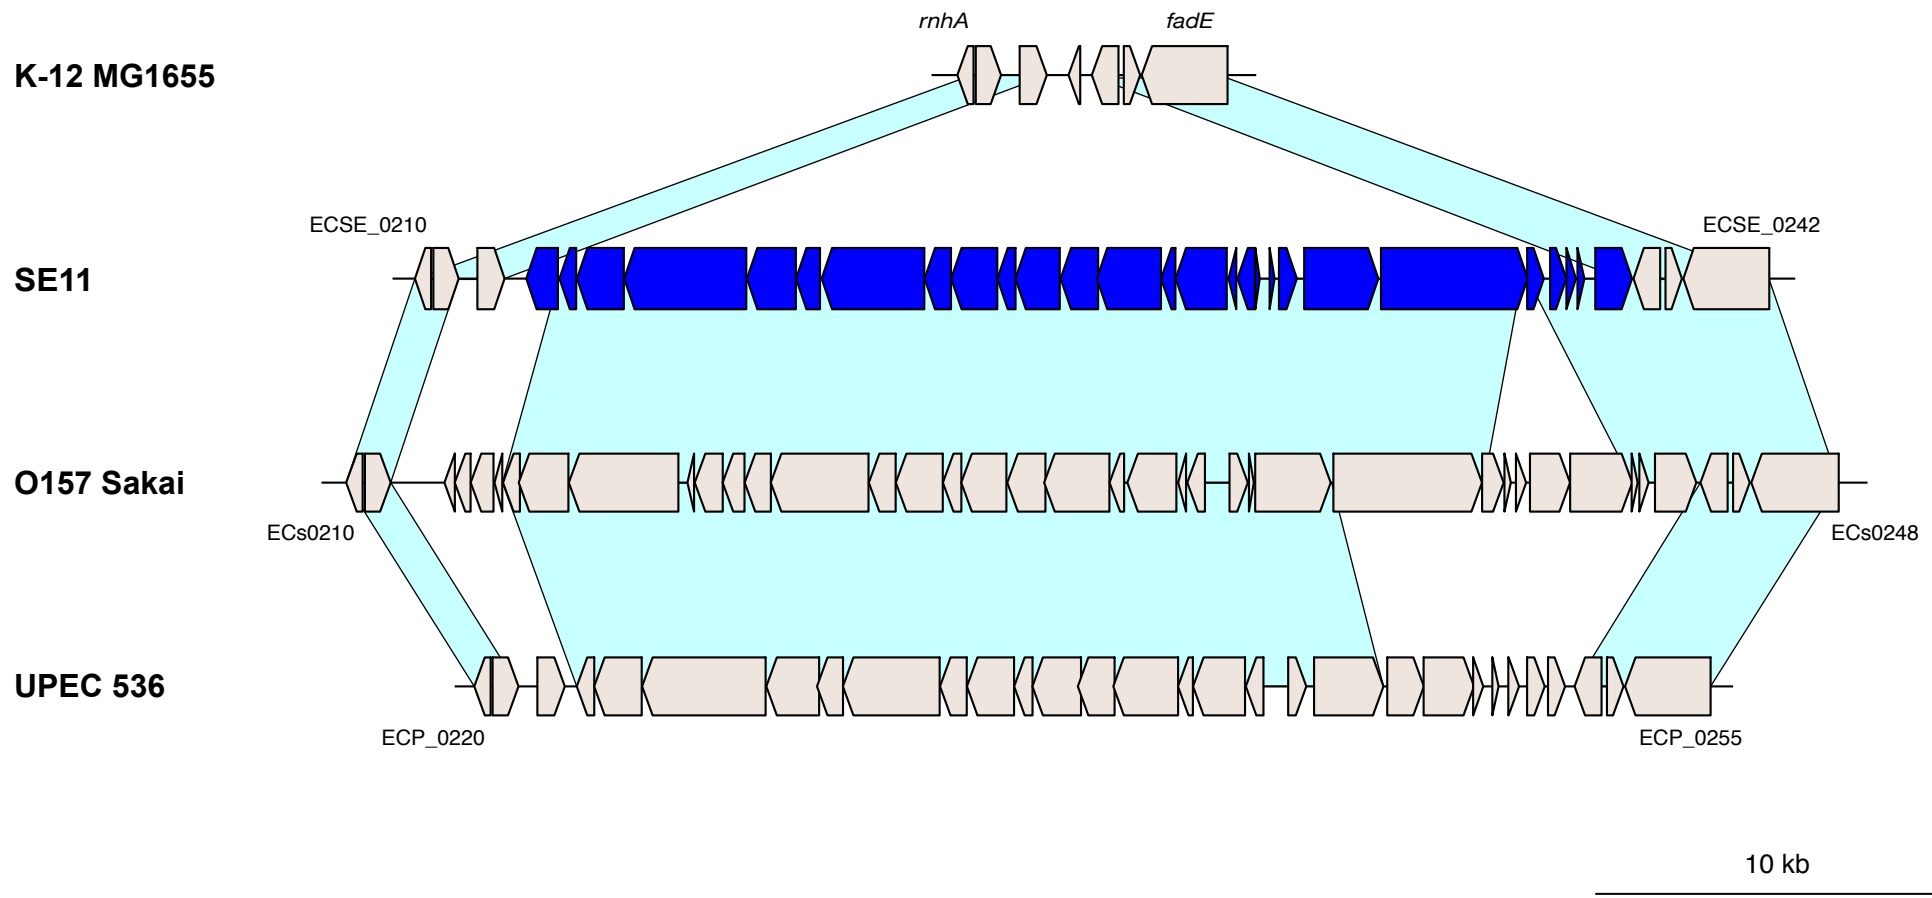

**Supplementary Figure S2**
